# Supplementary material for: Tungsten anchored onto functionalized SBA-15: an efficient catalyst for diastereoselective synthesis of 2-azapyrrolizidine alkaloid scaffolds
Source: Royal Society of Chemistry journal article supplement (doi:10.1039/c9ra02825k), 2019-01-01
Supplement: c9ra02825k1.pdf [file c9ra02825k1.pdf]

## Tungsten anchored onto functionalized SBA-15: An efficient catalyst for diastereoselective synthesis of 2-azapyrrolizidine alkaloid scaffolds

Javad Safaei-Ghomi\* and Atefeh Bakhtiari

Department of Organic Chemistry, Faculty of Chemistry, University of Kashan, Kashan, Iran. Fax: 98 591 2397; Tel: 98 591 2385;

E-mail: [Safaei@kashanu.ac.ir](mailto:Safaei@kashanu.ac.ir)

### <sup>1</sup>H NMR Spectra of compounds

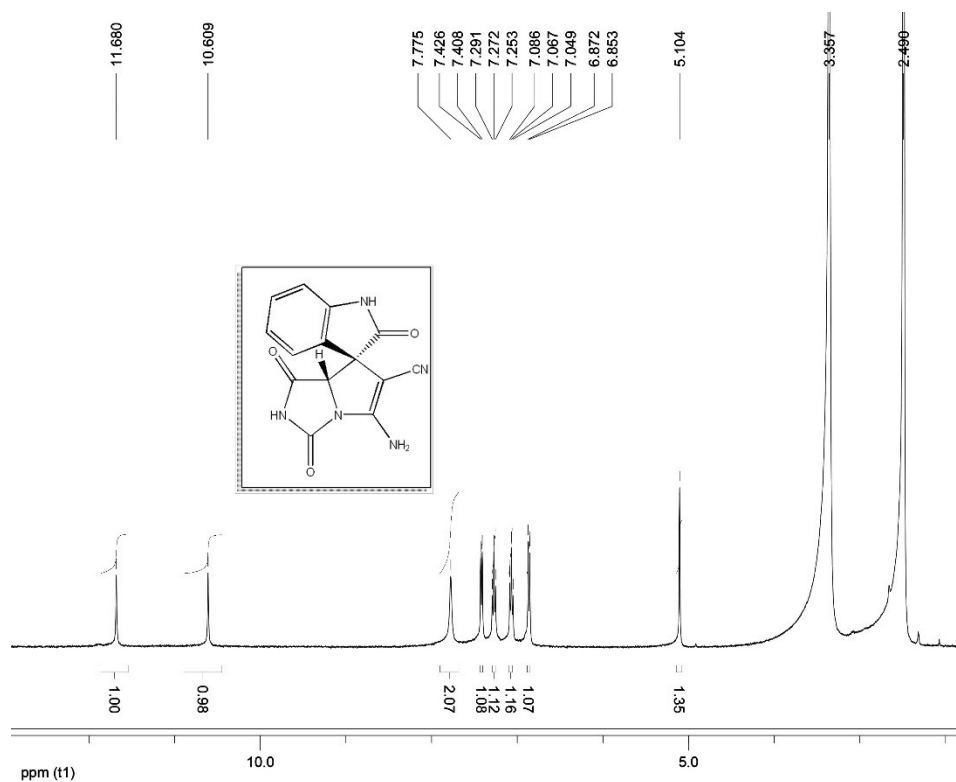

Figure S1. <sup>1</sup>H-NMR (400 MHz, DMSO-d<sub>6</sub>) spectrum of compound 4a.

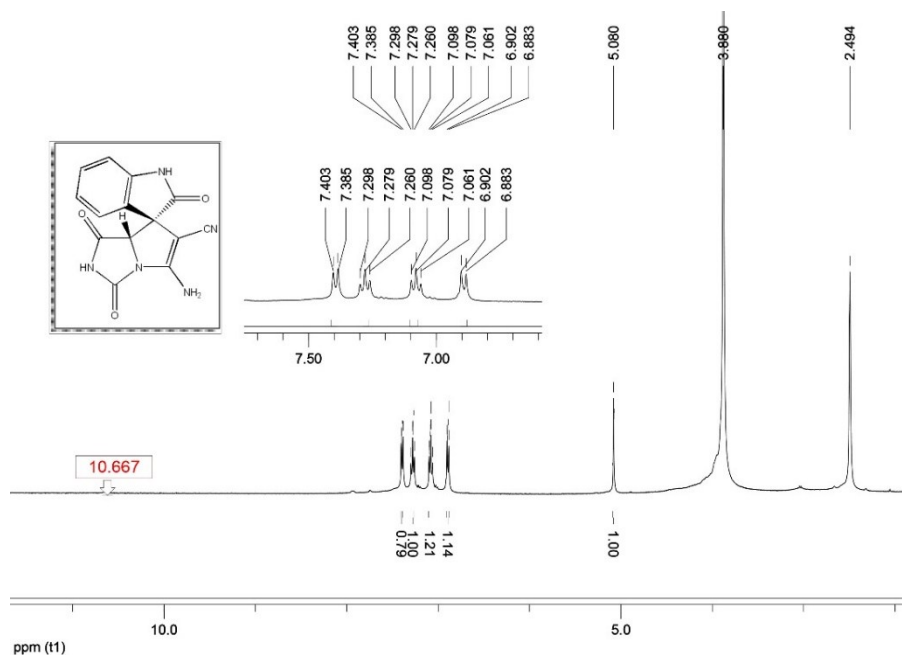

**Figure S2.** <sup>1</sup>H-NMR (400 MHz, DMSO-d<sub>6</sub> with a drop of D<sub>2</sub>O) spectrum of compound 4a.

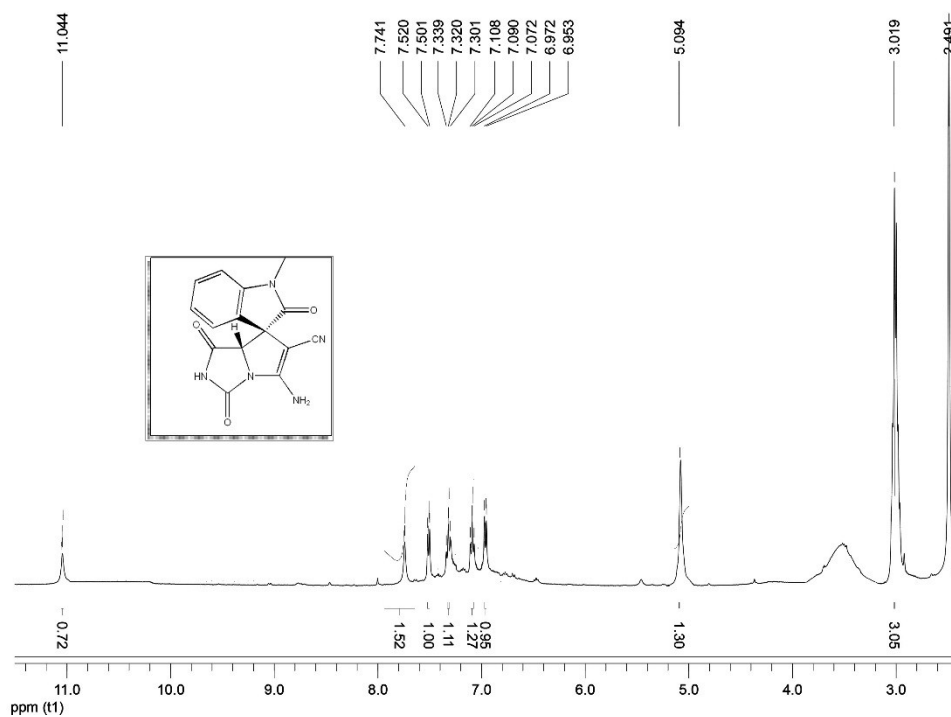

**Figure S3.** <sup>1</sup>H-NMR (400 MHz, DMSO-d<sub>6</sub>) spectrum of compound 4b.

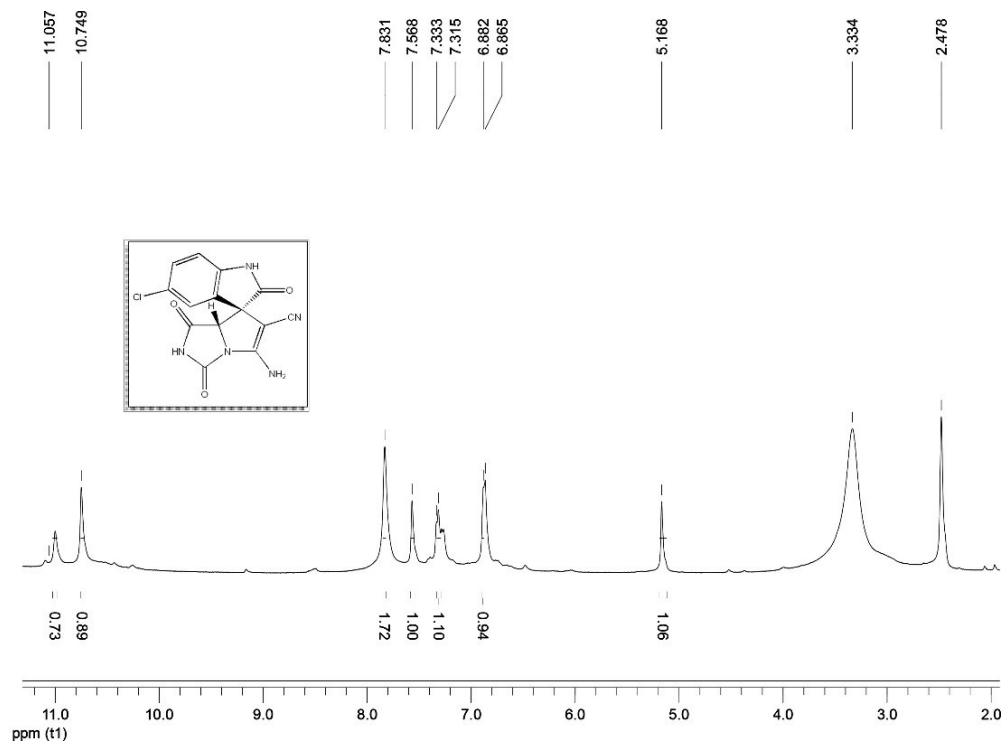

Figure S4.  $^1\text{H-NMR}$  (400 MHz,  $\text{DMSO-d}_6$ ) spectrum of compound 4c.

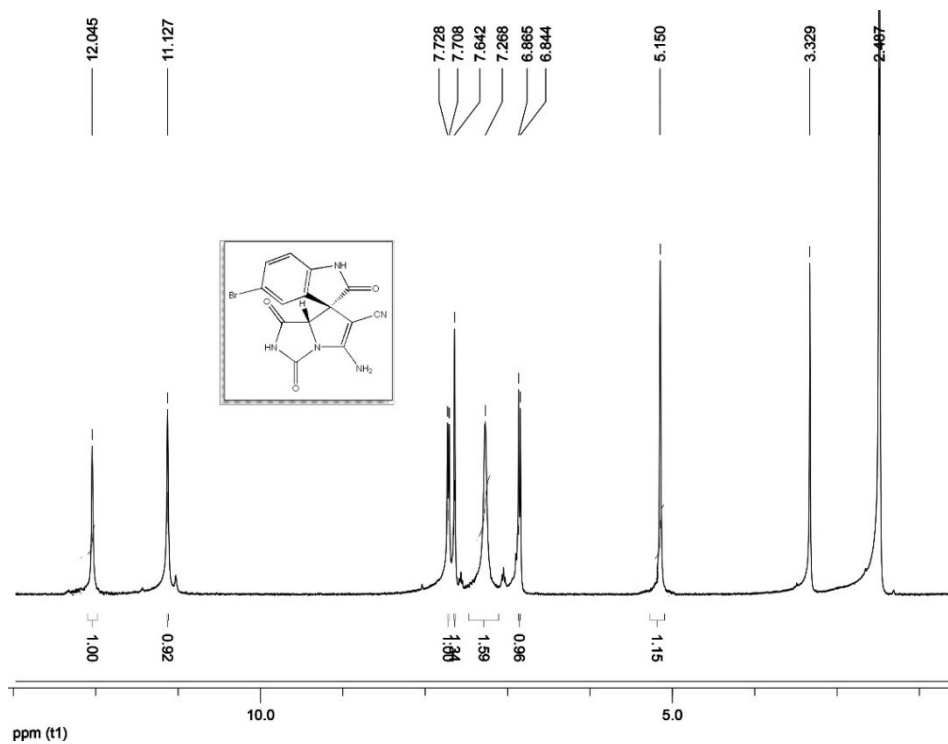

Figure S5.  $^1\text{H-NMR}$  (400 MHz,  $\text{DMSO-d}_6$ ) spectrum of compound 4d.

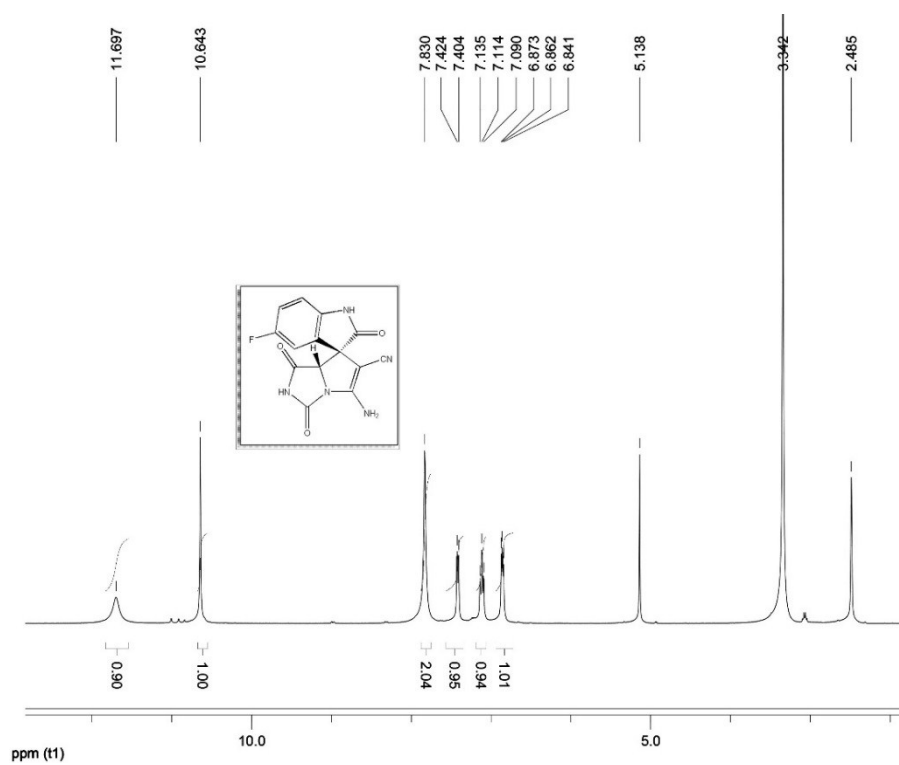

Figure S6.  $^1\text{H-NMR}$  (400 MHz,  $\text{DMSO-d}_6$ ) spectrum of compound 4e.

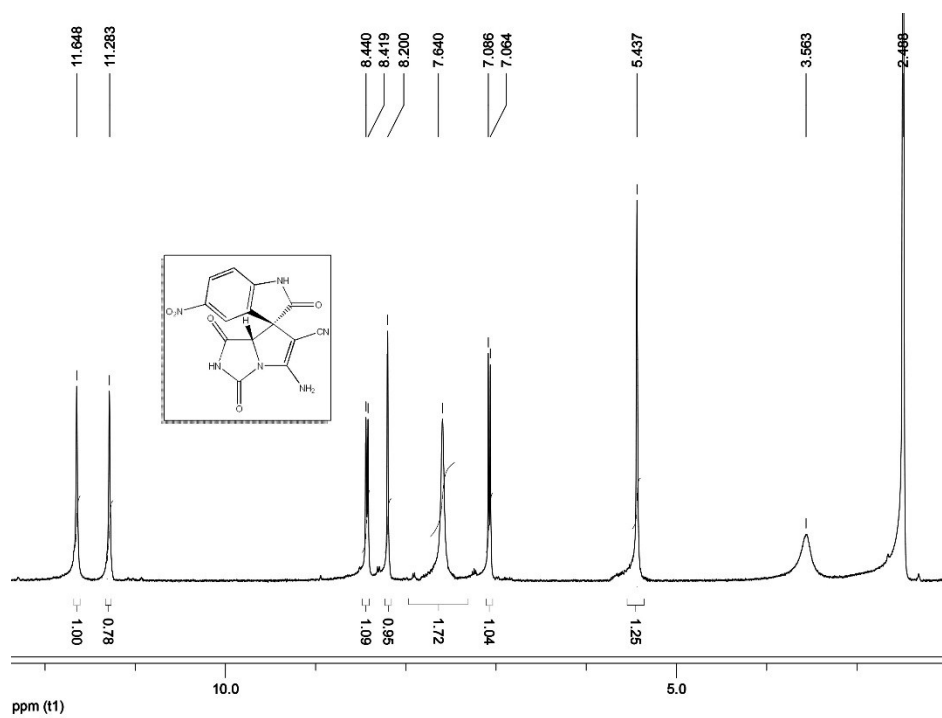

Figure S7.  $^1\text{H-NMR}$  (400 MHz,  $\text{DMSO-d}_6$ ) spectrum of compound 4g.

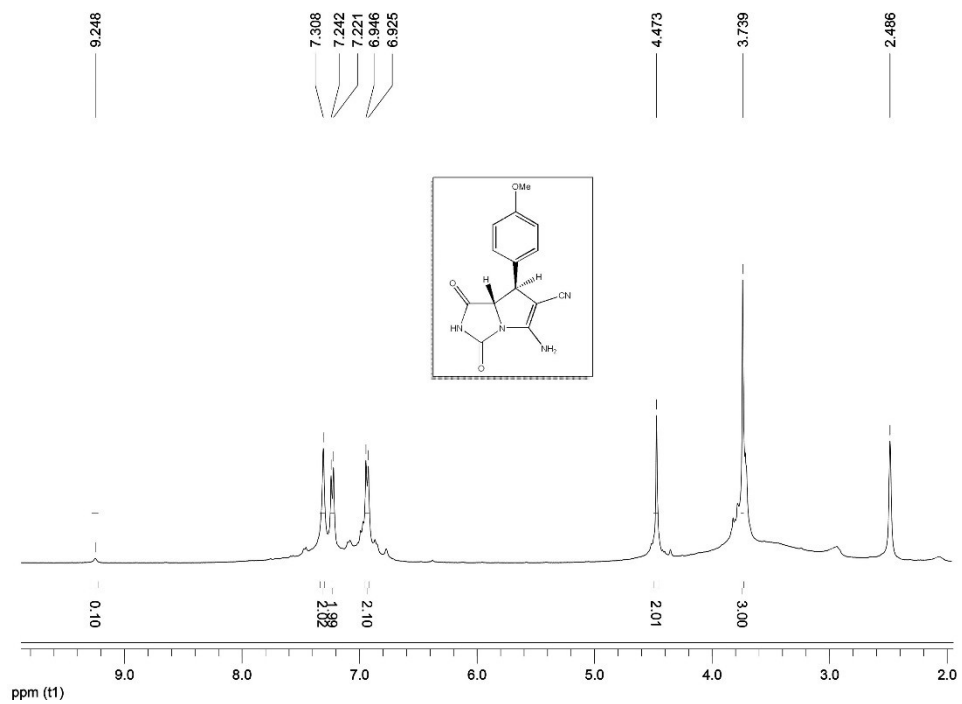

Figure S8.  $^1\text{H-NMR}$  (400 MHz,  $\text{DMSO-d}_6$ ) spectrum of compound 4i.

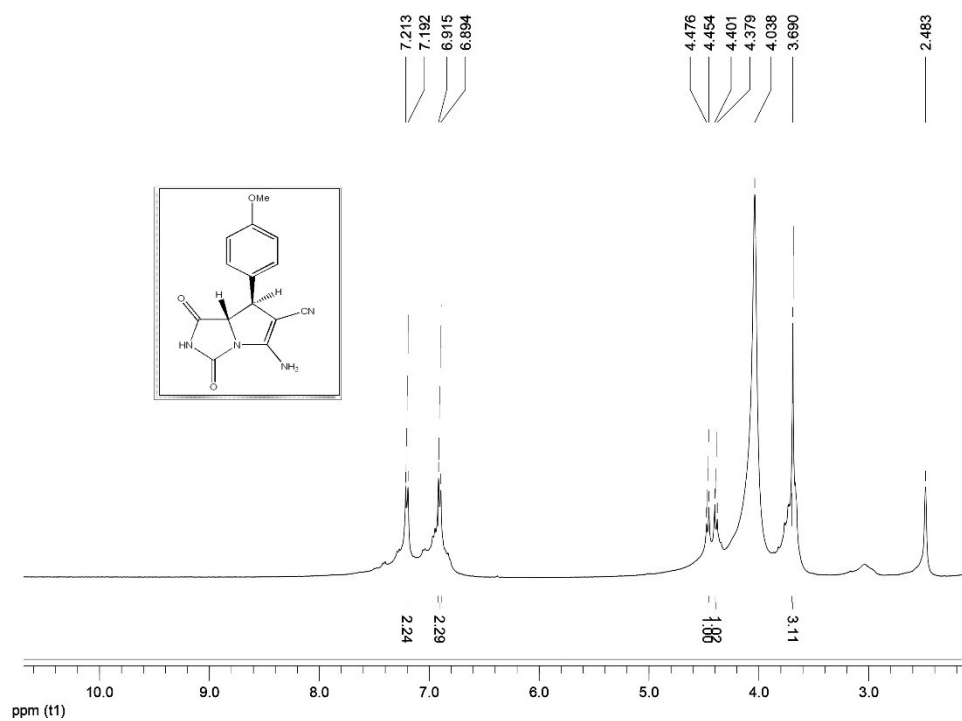

Figure S9.  $^1\text{H-NMR}$  (400 MHz,  $\text{DMSO-d}_6$  with a drop of  $\text{D}_2\text{O}$ ) spectrum of compound 4i.

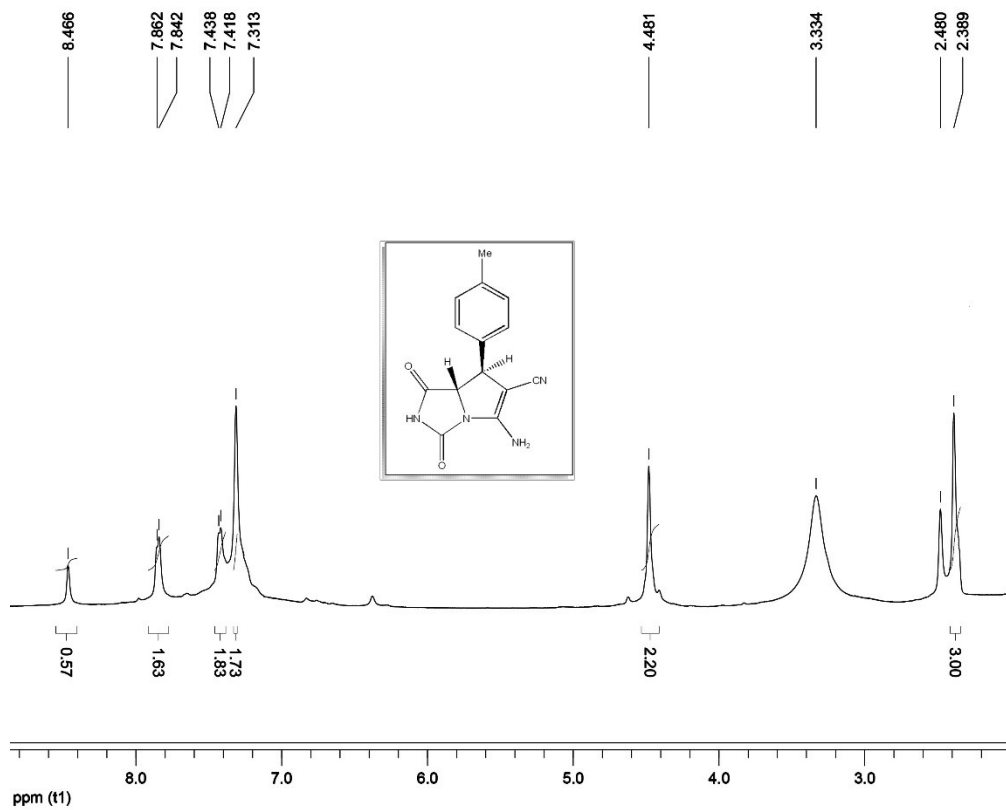

Figure S10.  $^1\text{H-NMR}$  (400 MHz, DMSO- $\text{d}_6$ ) spectrum of compound 4j.

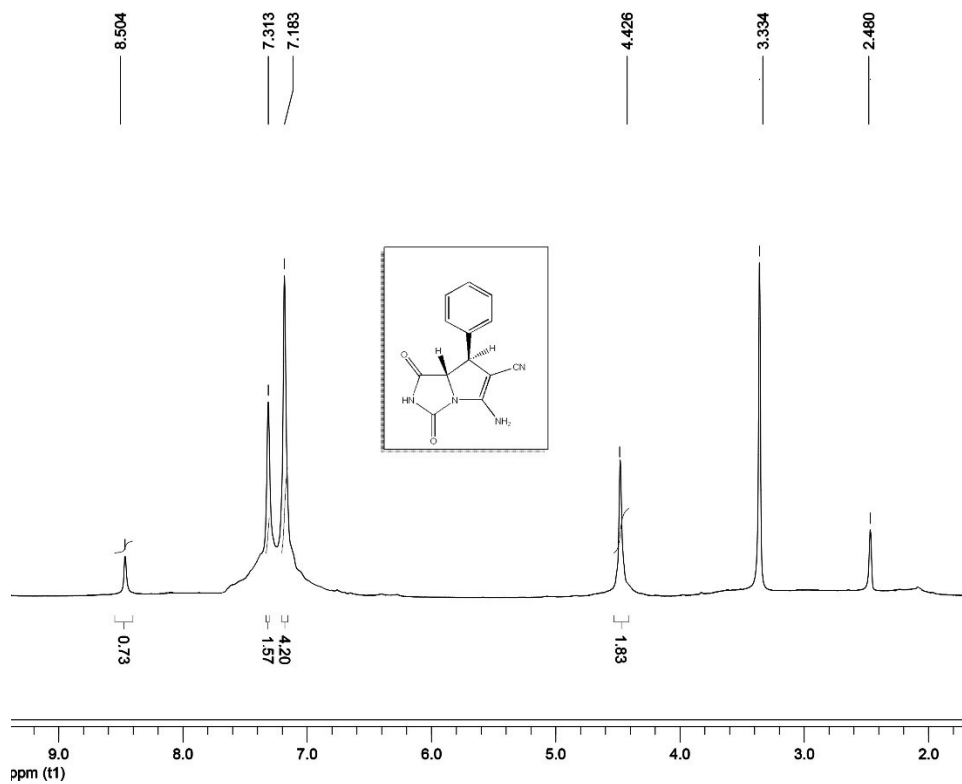

**Figure S11.**  $^1\text{H-NMR}$  (400 MHz,  $\text{DMSO-d}_6$ ) spectrum of compound 4k.

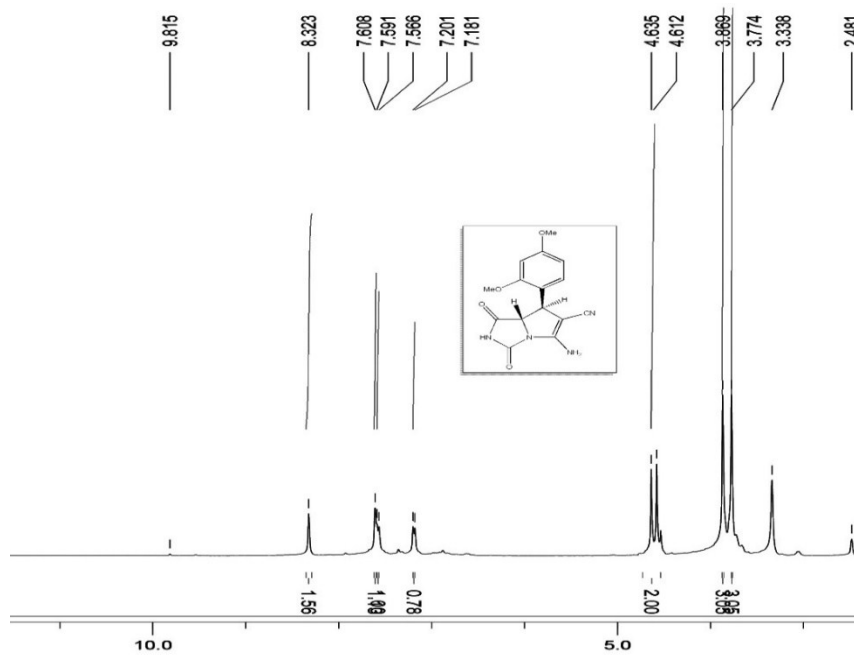

**Figure S12.**  $^1\text{H-NMR}$  (400 MHz,  $\text{DMSO-d}_6$ ) spectrum of compound 4l.

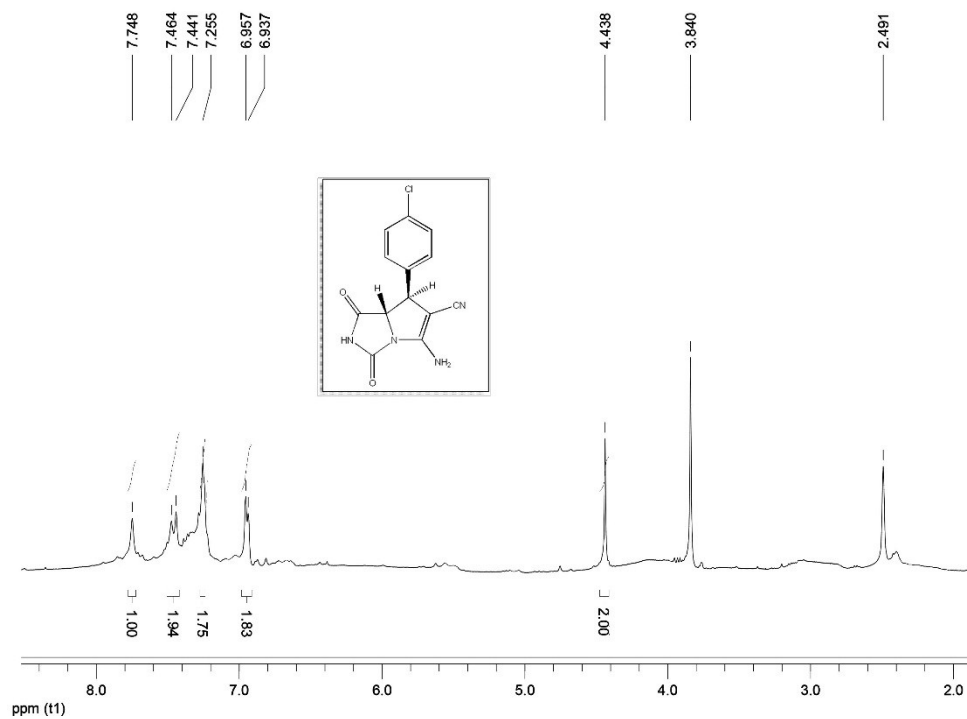

Figure S13. <sup>1</sup>H-NMR (400 MHz, DMSO-d<sub>6</sub>) spectrum of compound 4o.
